# Supplementary material for: Regenerative Responses and Axon Pathfinding of Retinal Ganglion Cells in Chronically Injured Mice
Source: PubMed Central journal article supplement — Invest Ophthalmol Vis Sci. 2017 Mar;58(3):1743–50. doi: 10.1167/iovs.16-19873 (PMC5361588; doi:10.1167/iovs.16-19873), 2017-03
Supplement: iovs-58-02-71_s01.pdf [file iovs-58-02-71_s01.pdf]

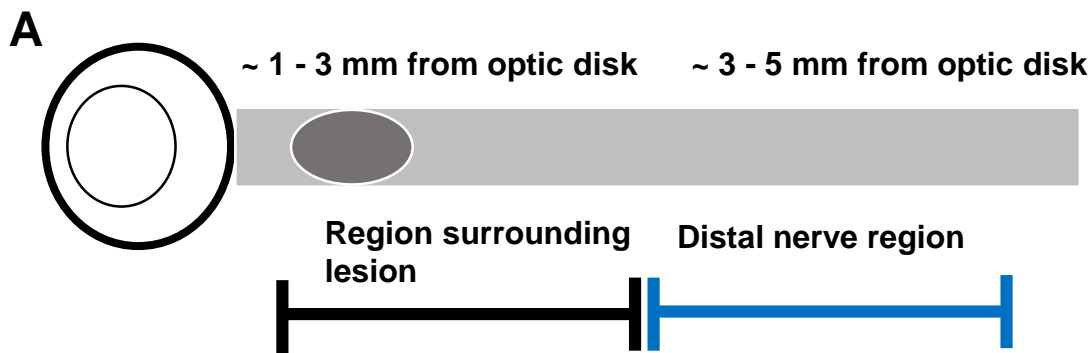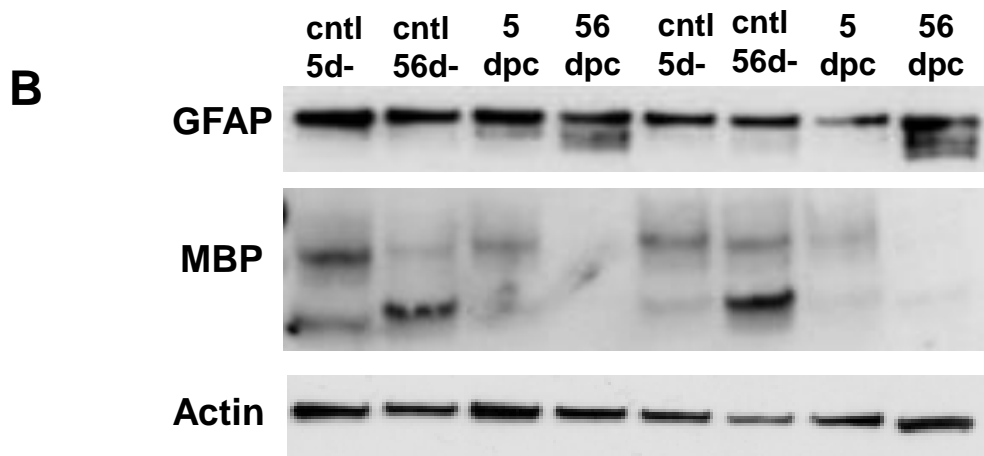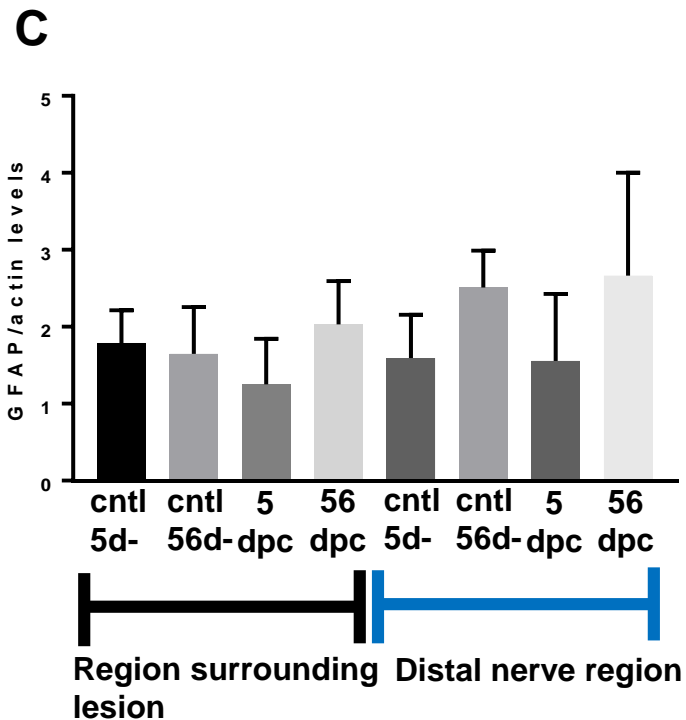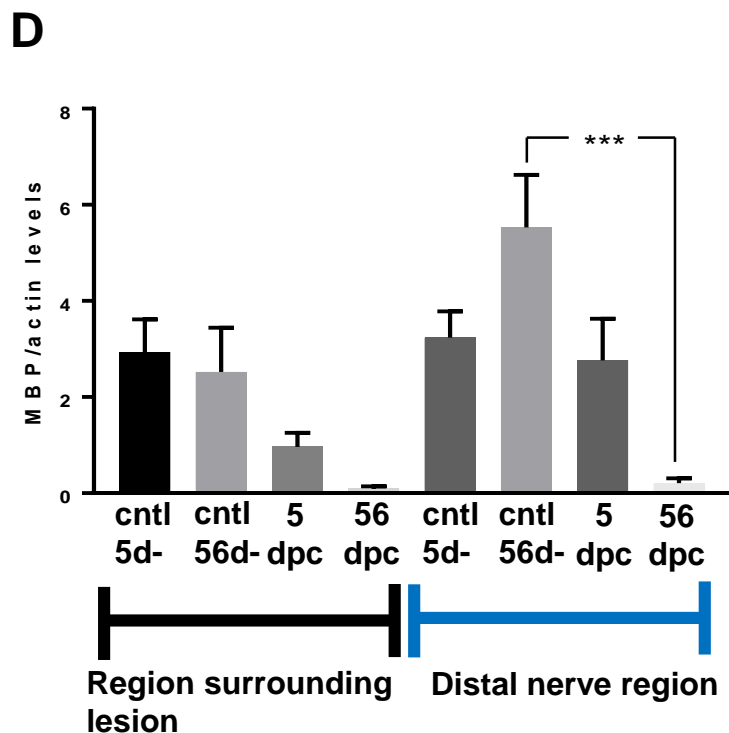

Supplementary Figure 1

WT animal Case #1 (21dpc)

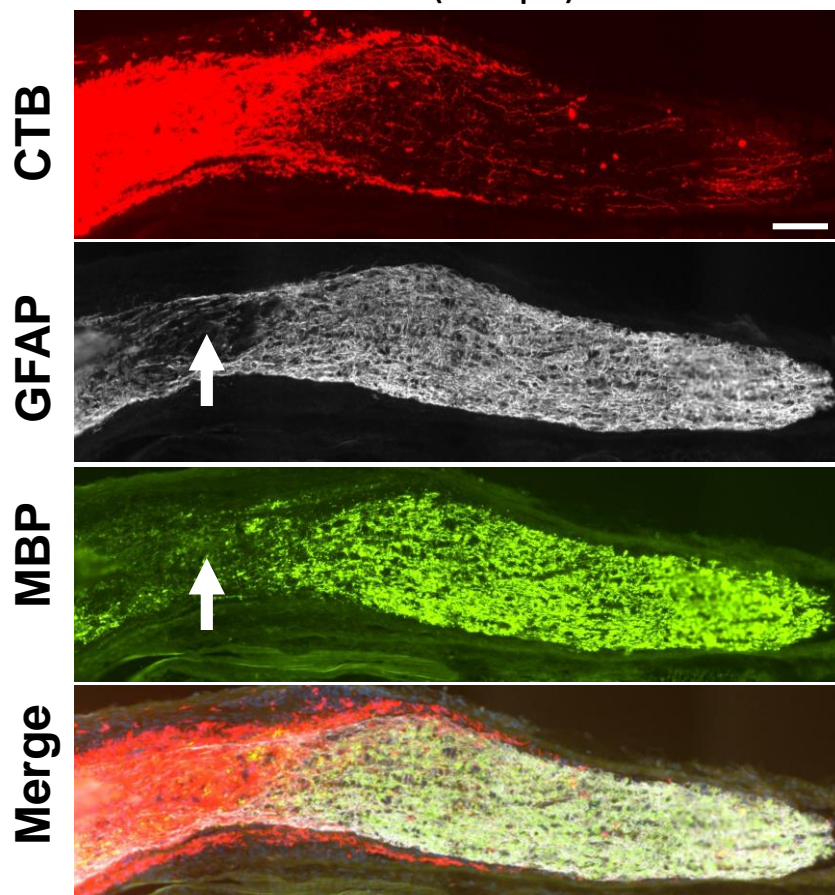

WT animal Case #2 (21dpc)

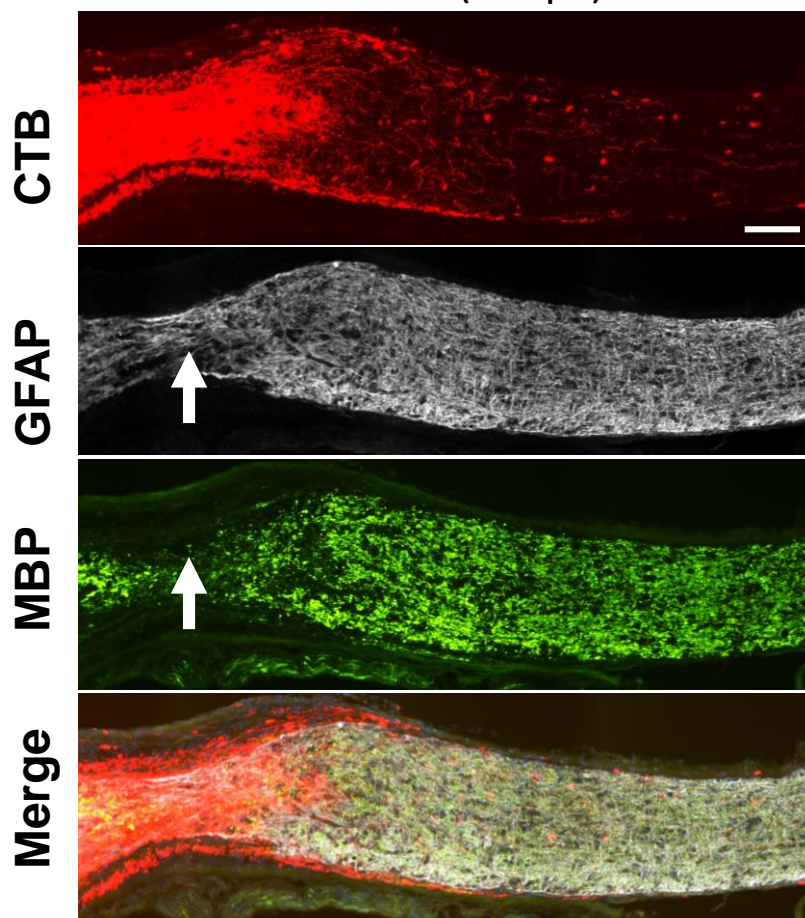

Supplementary Figure 2

BAX KO Case #1 (21dpc)

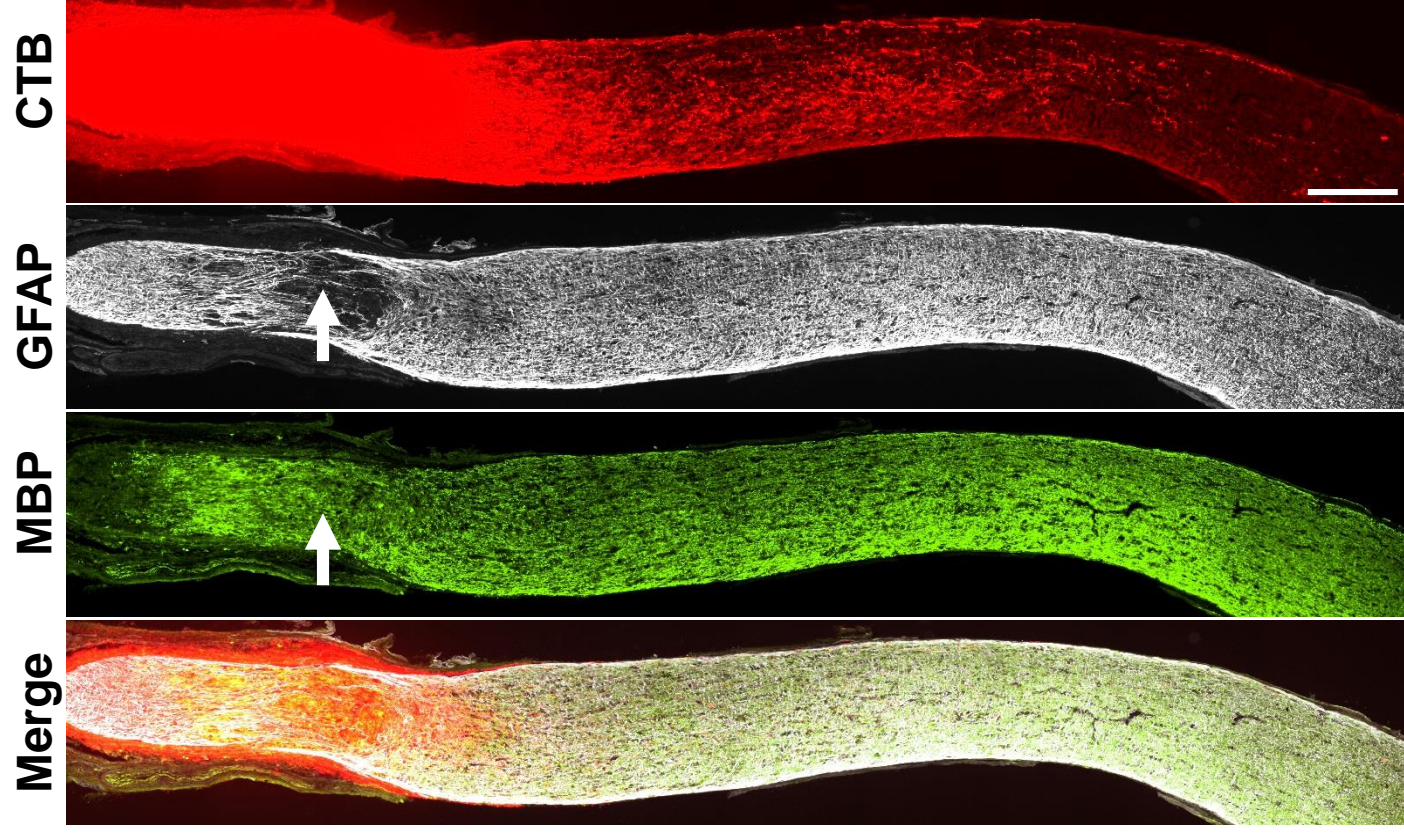

BAX KO Case #2 (21dpc)

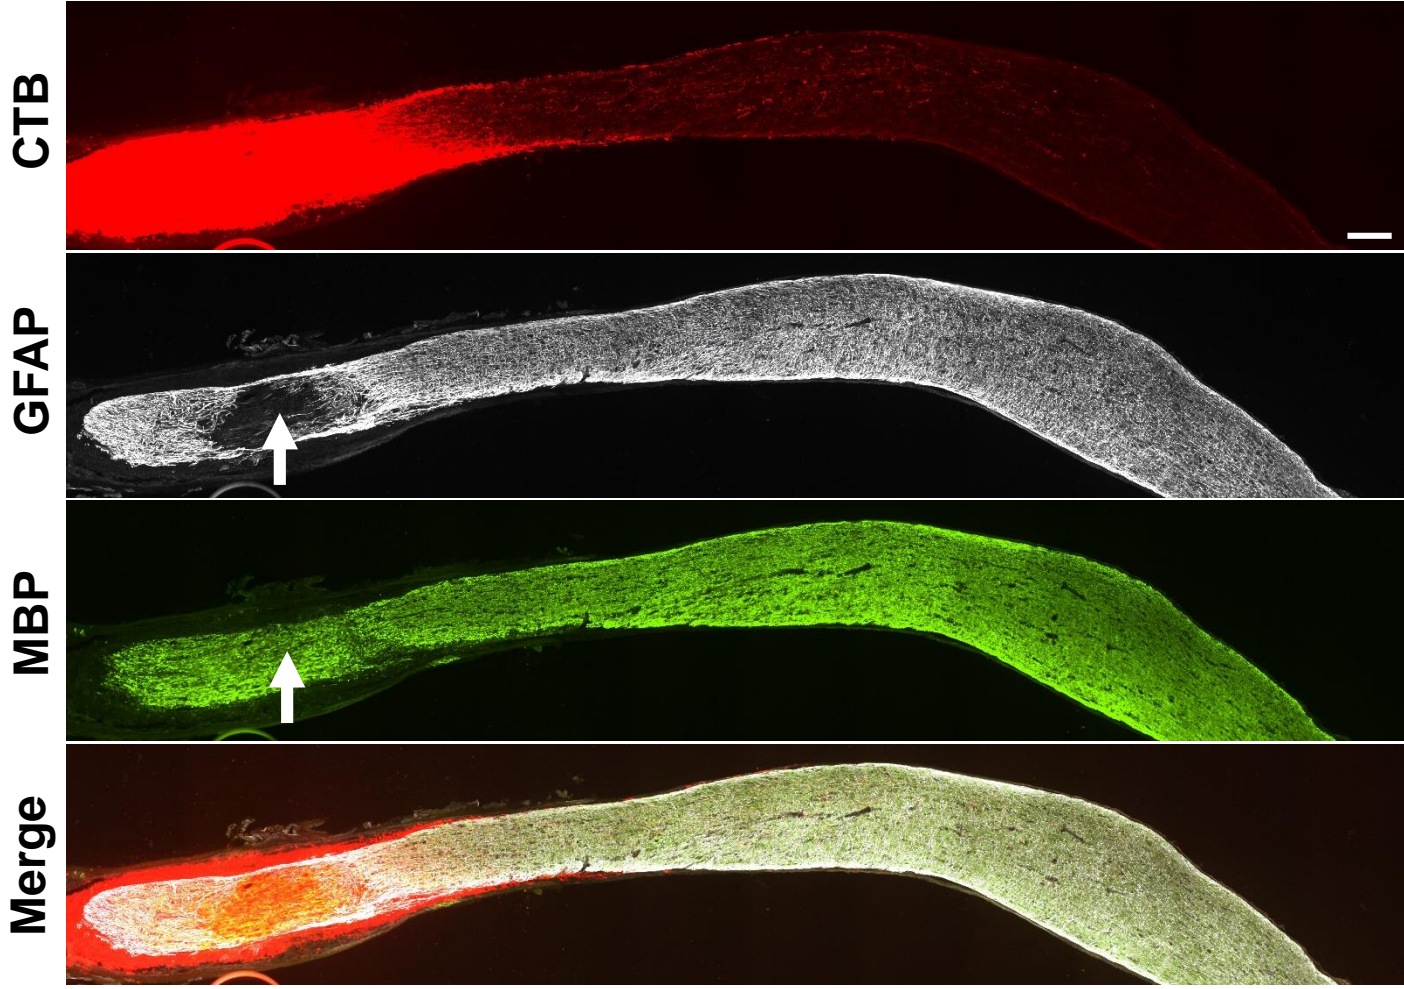

Supplementary Figure 3
